# Supplementary material
Source: PubMed Central journal article supplement (PMC7870570)

Fig S2. The flowchart of collecting RLM-containing domains.

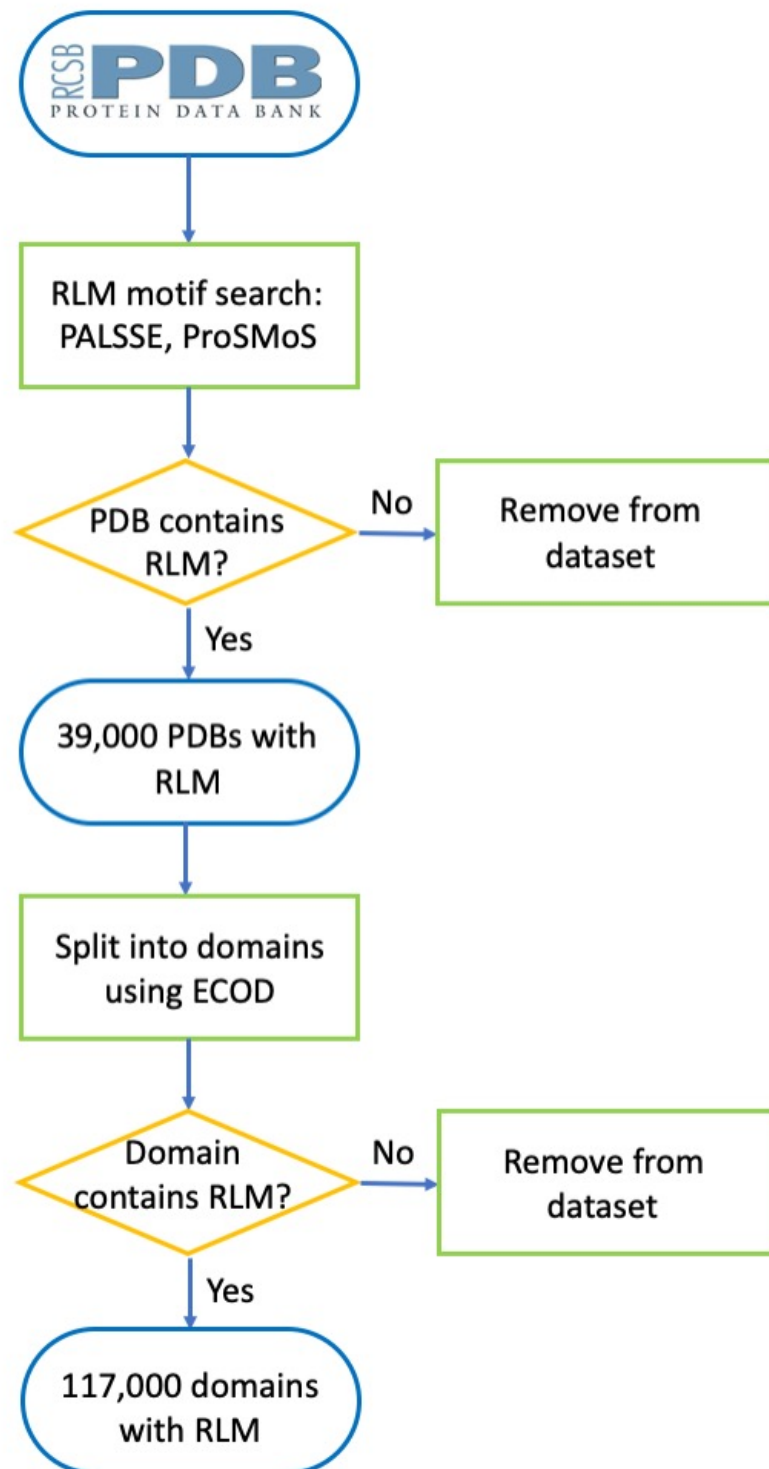

**Fig S2. The flowchart of clustering RLM-containing domains into homologous clusters.**

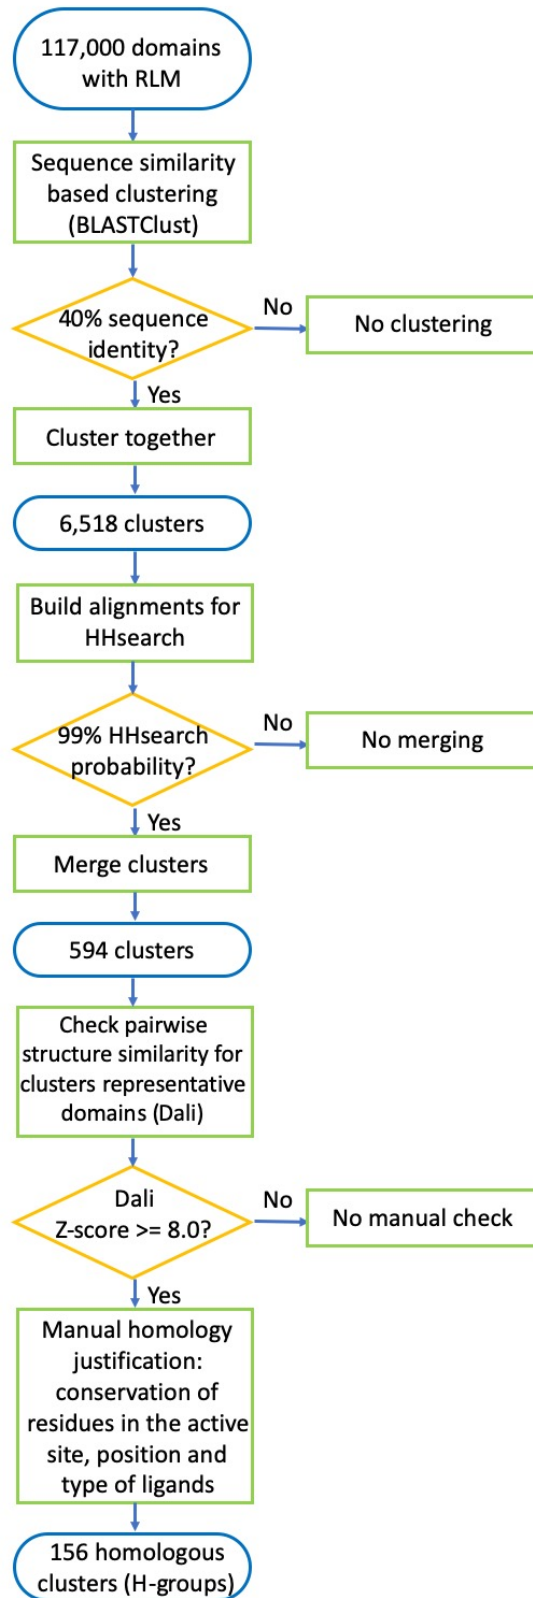

Supplement: NIHMS1658733-supplement-2.pdf [file NIHMS1658733-supplement-2.pdf]
